# Supplementary material for: Identification of rifampin-regulated functional modules and related microRNAs in human hepatocytes based on the protein interaction network
Source: PubMed Central journal article supplement (PMC5001204; doi:10.1186/s12864-016-2909-6), 2016-08-22
Supplement: 12864_2016_2909_MOESM1_ESM.pdf [file 12864_2016_2909_MOESM1_ESM.pdf]

| Row. names | logFC    | logCPM   | LR       | PValue   | FDR      | score    |
|------------|----------|----------|----------|----------|----------|----------|
| ABCB1      | 0.781842 | 8.247882 | 74.32397 | 6.63E-18 | 9.01E-16 | 29.31959 |
| ADH6       | -0.51482 | 7.192559 | 30.93753 | 2.66E-08 | 1.15E-06 | 8.637564 |
| ADRB1      | 1.627262 | 1.193321 | 41.22681 | 1.36E-10 | 8.09E-09 | 13.57225 |
| AGTR1      | -0.5116  | 4.440014 | 21.18387 | 4.17E-06 | 0.000105 | 3.909815 |
| AKT1S1     | 0.487082 | 3.376339 | 14.0089  | 0.000182 | 0.002771 | 0.378282 |
| ANXA1      | -0.45524 | 3.892246 | 13.80406 | 0.000203 | 0.003036 | 0.276354 |
| AP1B1      | 0.444063 | 5.456307 | 19.60818 | 9.51E-06 | 0.000215 | 3.138723 |
| AQP3       | -0.42789 | 5.351138 | 17.61059 | 2.71E-05 | 0.000541 | 2.15928  |
| ARRB1      | 0.577594 | 3.07078  | 16.40234 | 5.12E-05 | 0.000942 | 1.564233 |
| BAG2       | 0.471139 | 5.358268 | 21.82267 | 2.99E-06 | 8.03E-05 | 4.220938 |
| BCL3       | 0.864843 | 1.482152 | 18.00232 | 2.21E-05 | 0.000451 | 2.350041 |
| BIN1       | 0.822391 | 4.289316 | 52.66569 | 3.95E-13 | 3.30E-11 | 19.03586 |
| BIRC3      | -0.41185 | 8.811137 | 20.94068 | 4.74E-06 | 0.000117 | 3.789983 |
| BLVRB      | 0.464232 | 3.861911 | 14.17867 | 0.000166 | 0.002569 | 0.462701 |
| CARD10     | 0.516718 | 3.839282 | 18.35077 | 1.84E-05 | 0.000382 | 2.521415 |
| CAV1       | -0.8518  | 6.351125 | 78.42201 | 8.32E-19 | 1.21E-16 | 31.26084 |
| CAV2       | -0.5386  | 7.080655 | 33.18784 | 8.37E-09 | 3.87E-07 | 9.719018 |
| CD14       | 1.630916 | 5.953018 | 262.1085 | 5.96E-59 | 2.93E-56 | 117.7177 |
| CD36       | -0.89744 | 0.990976 | 13.77571 | 0.000206 | 0.003064 | 0.26224  |
| CEBPA      | 0.581282 | 5.119956 | 30.98112 | 2.61E-08 | 1.13E-06 | 8.655312 |
| CITED2     | -0.39253 | 6.917221 | 17.68095 | 2.61E-05 | 0.000525 | 2.194446 |
| CREBBP     | 0.382177 | 4.059073 | 10.85691 | 0.000984 | 0.010843 | -1.20069 |
| CYB5A      | 0.707906 | 9.318423 | 62.36751 | 2.85E-15 | 2.94E-13 | 23.64839 |
| CYP1A1     | 1.26928  | 5.792901 | 119.8092 | 6.96E-28 | 1.44E-25 | 50.81038 |
| CYP2C19    | 0.794506 | 7.990218 | 72.28439 | 1.86E-17 | 2.45E-15 | 28.35477 |
| CYP2C9     | 1.012758 | 10.69292 | 126.41   | 2.50E-29 | 5.61E-27 | 53.92165 |
| CYP2E1     | -1.43406 | 7.783496 | 232.2929 | 1.89E-52 | 8.03E-50 | 103.7166 |
| EGLN2      | 0.4574   | 3.718154 | 13.859   | 0.000197 | 0.002969 | 0.303699 |
| EID3       | 0.78844  | 3.13823  | 32.47515 | 1.21E-08 | 5.51E-07 | 9.37431  |
| FAM46A     | -0.67256 | 6.570705 | 50.25176 | 1.35E-12 | 1.06E-10 | 17.8864  |
| FN1        | 0.605011 | 11.15734 | 46.17581 | 1.08E-11 | 7.35E-10 | 15.94148 |
| FRAT1      | 0.735218 | 2.843312 | 25.01537 | 5.69E-07 | 1.80E-05 | 5.77275  |
| GATM       | -0.59971 | 11.3772  | 45.56342 | 1.48E-11 | 9.89E-10 | 15.64678 |
| GJB2       | 0.692627 | 5.829275 | 49.8689  | 1.64E-12 | 1.27E-10 | 17.70439 |
| GRIA3      | -0.43008 | 4.360965 | 14.42511 | 0.000146 | 0.002302 | 0.58515  |
| HMOX1      | 0.712809 | 3.455651 | 30.70411 | 3.01E-08 | 1.28E-06 | 8.521947 |
| HP         | -0.60141 | 11.68125 | 45.67201 | 1.40E-11 | 9.45E-10 | 15.69876 |
| HRG        | 0.418161 | 6.456386 | 19.27369 | 1.13E-05 | 0.00025  | 2.977421 |
| HSPA1A     | 0.382442 | 5.314084 | 13.81043 | 0.000202 | 0.003033 | 0.279522 |
| HTT        | 0.373734 | 6.073422 | 15.04474 | 0.000105 | 0.001738 | 0.892547 |
| ID2        | -0.51691 | 6.925046 | 30.67253 | 3.05E-08 | 1.30E-06 | 8.509599 |
| IKBKG      | 0.491087 | 3.287642 | 13.80327 | 0.000203 | 0.003036 | 0.275963 |
| ITGA1      | -0.37537 | 7.174065 | 16.46376 | 4.96E-05 | 0.000917 | 1.593927 |

|          |          |          |          |          |          |          |
|----------|----------|----------|----------|----------|----------|----------|
| KCNK5    | -1.13739 | 3.660467 | 70.14849 | 5.50E-17 | 6.82E-15 | 27.34074 |
| KEAP1    | 0.582621 | 4.156287 | 25.81962 | 3.75E-07 | 1.24E-05 | 6.16273  |
| KRT18    | -0.36685 | 7.972157 | 16.28497 | 5.45E-05 | 0.000998 | 1.505812 |
| KRT8     | -0.42013 | 8.594638 | 21.52194 | 3.50E-06 | 9.07E-05 | 4.073637 |
| LRP1     | 0.635707 | 5.39105  | 37.88987 | 7.49E-10 | 3.99E-08 | 11.97654 |
| LRP5     | 0.543532 | 3.646617 | 18.94682 | 1.34E-05 | 0.000287 | 2.817996 |
| MAFG     | 0.426676 | 3.972673 | 13.04065 | 0.000305 | 0.004215 | -0.10428 |
| MAP2     | 0.448175 | 4.15576  | 13.53696 | 0.000234 | 0.003404 | 0.143314 |
| MAP3K14  | 0.963198 | 2.708224 | 40.36074 | 2.11E-10 | 1.22E-08 | 13.16146 |
| MICAL1   | -0.42479 | 4.247371 | 13.66213 | 0.000219 | 0.00322  | 0.205678 |
| MSX1     | 1.58731  | 0.224097 | 26.33631 | 2.87E-07 | 9.80E-06 | 6.412872 |
| MYO7A    | 0.750208 | 4.603307 | 46.98494 | 7.15E-12 | 4.91E-10 | 16.32723 |
| MYRIP    | -0.57456 | 4.278972 | 25.06049 | 5.56E-07 | 1.77E-05 | 5.794367 |
| NEDD9    | -0.40566 | 8.096531 | 19.95967 | 7.91E-06 | 0.000183 | 3.311021 |
| NFE2L2   | 0.90388  | 7.218413 | 94.16677 | 2.90E-22 | 4.94E-20 | 38.70748 |
| NOS1AP   | -0.74828 | 3.203347 | 29.54472 | 5.46E-08 | 2.17E-06 | 7.964964 |
| NT5E     | -0.55848 | 5.901211 | 32.55995 | 1.16E-08 | 5.31E-07 | 9.41378  |
| PLD2     | 0.549999 | 2.889249 | 14.46841 | 0.000143 | 0.002263 | 0.606654 |
| POLR2A   | 0.611897 | 3.835053 | 25.20689 | 5.15E-07 | 1.67E-05 | 5.866012 |
| POLR2E   | 0.469134 | 4.568353 | 18.64733 | 1.57E-05 | 0.000333 | 2.669838 |
| POR      | 1.197264 | 6.768948 | 156.9173 | 5.34E-36 | 1.42E-33 | 68.28717 |
| PTPRF    | 0.639366 | 6.436931 | 45.21186 | 1.77E-11 | 1.17E-09 | 15.47942 |
| RBBP8    | -0.38942 | 5.775735 | 15.86234 | 6.81E-05 | 0.001207 | 1.297448 |
| SERPINE1 | 0.399277 | 9.802528 | 19.97795 | 7.83E-06 | 0.000182 | 3.320529 |
| SMAD3    | 0.42998  | 4.504394 | 15.20517 | 9.64E-05 | 0.001624 | 0.972402 |
| SNRK     | 0.387346 | 5.996178 | 16.13447 | 5.90E-05 | 0.001063 | 1.431608 |
| SNX7     | -0.43596 | 5.40253  | 18.67752 | 1.55E-05 | 0.000329 | 2.681829 |
| SQSTM1   | 0.464945 | 9.119435 | 26.97471 | 2.06E-07 | 7.34E-06 | 6.723025 |
| SRCAP    | 0.771987 | 3.559544 | 36.27857 | 1.71E-09 | 8.74E-08 | 11.20443 |
| SREBF1   | 0.619251 | 4.518346 | 31.41034 | 2.09E-08 | 9.17E-07 | 8.863124 |
| STIP1    | 0.363492 | 7.059521 | 15.38659 | 8.76E-05 | 0.001501 | 1.061934 |
| TCEA2    | 1.194078 | 2.840003 | 57.36776 | 3.61E-14 | 3.30E-12 | 21.27367 |
| THBS1    | -0.39505 | 6.26565  | 15.97468 | 6.42E-05 | 0.001146 | 1.352607 |
| TNFRSF19 | 1.605388 | 3.345264 | 102.7133 | 3.87E-24 | 7.17E-22 | 42.74484 |
| TNIP1    | 0.426098 | 6.621468 | 20.65746 | 5.49E-06 | 0.000132 | 3.652595 |
| TRAF2    | 0.633813 | 3.104377 | 21.41362 | 3.70E-06 | 9.50E-05 | 4.021662 |
| TRIM31   | 2.498618 | 1.829416 | 120.8331 | 4.16E-28 | 8.85E-26 | 51.29175 |
| UGT1A4   | 1.295465 | 10.19577 | 202.9222 | 4.81E-46 | 1.81E-43 | 89.92115 |
| USP2     | 1.924259 | 0.738857 | 49.79502 | 1.71E-12 | 1.31E-10 | 17.6653  |
| WEE1     | -0.71408 | 6.7836   | 57.95013 | 2.69E-14 | 2.51E-12 | 21.54881 |
| ZCCHC14  | 0.544027 | 4.22095  | 22.55632 | 2.04E-06 | 5.69E-05 | 4.578528 |
