# Supplementary material for: Identification of rifampin-regulated functional modules and related microRNAs in human hepatocytes based on the protein interaction network
Source: PubMed Central journal article supplement (PMC5001204; doi:10.1186/s12864-016-2909-6), 2016-08-22
Supplement: 12864_2016_2909_MOESM2_ESM.pdf [file 12864_2016_2909_MOESM2_ESM.pdf]

| moudule | name     | logCPM   | logFC    | LR       | pval     | FDR      |
|---------|----------|----------|----------|----------|----------|----------|
| 1       | RAD23A   | 3.909317 | 0.336953 | 7.8921   | 0.004965 | 0.236908 |
| 1       | BIN1     | 4.289316 | 0.822391 | 52.66569 | 3.95E-13 | 3.30E-11 |
| 1       | IGF1     | 5.695979 | -1.1966  | 139.6325 | 3.20E-32 | 0.558752 |
| 1       | CD14     | 5.953018 | 1.630916 | 262.1085 | 5.96E-59 | 2.93E-56 |
| 1       | FN1      | 11.15734 | 0.605011 | 46.17581 | 1.08E-11 | 1.87E-06 |
| 1       | PLD2     | 2.889249 | 0.549999 | 14.46841 | 1.43E-04 | 0.615714 |
| 1       | LRP1     | 5.39105  | 0.635707 | 37.88987 | 7.49E-10 | 0.304046 |
| 1       | CAV2     | 7.080655 | -0.5386  | 33.18784 | 8.37E-09 | 3.87E-07 |
| 1       | PTPRF    | 6.436931 | 0.639366 | 45.21186 | 1.77E-11 | 0.05891  |
| 1       | ABCB1    | 8.247882 | 0.781842 | 74.32397 | 6.63E-18 | 9.01E-16 |
| 1       | TNFRSF19 | 3.345264 | 1.605388 | 102.7133 | 3.87E-24 | 0.689091 |
| 1       | CAV1     | 6.351125 | -0.8518  | 78.42201 | 8.32E-19 | 1.21E-16 |
| 1       | TRIM31   | 1.829416 | 2.498618 | 120.8331 | 4.16E-28 | 0.277165 |
| 1       | TCEA2    | 2.840003 | 1.194078 | 57.36776 | 3.61E-14 | 0.270409 |
| 1       | TRAF2    | 3.104377 | 0.633813 | 21.41362 | 3.70E-06 | 0.607507 |
| 1       | GJB2     | 5.829275 | 0.692627 | 49.8689  | 1.64E-12 | 0.752952 |
| 1       | USP2     | 0.738857 | 1.924259 | 49.79502 | 1.71E-12 | 0.867063 |
| 1       | MAP3K14  | 2.708224 | 0.963198 | 40.36074 | 2.11E-10 | 0.185909 |
| 2       | CYP1A1   | 5.792901 | 1.26928  | 119.8092 | 6.96E-28 | 1.44E-25 |
| 2       | POR      | 6.768948 | 1.197264 | 156.9173 | 5.34E-36 | 0.533644 |
| 2       | CYP2E1   | 7.783496 | -1.43406 | 232.2929 | 1.89E-52 | 8.03E-50 |
| 2       | CYP2C9   | 10.69292 | 1.012758 | 126.41   | 2.50E-29 | 5.61E-27 |
| 2       | CYB5A    | 9.318423 | 0.707906 | 62.36751 | 2.85E-15 | 2.94E-13 |
| 2       | CYP2C19  | 7.990218 | 0.794506 | 72.28439 | 1.86E-17 | 2.45E-15 |
| 2       | UGT1A4   | 10.19577 | 1.295465 | 202.9222 | 4.81E-46 | 2.04E-37 |
| 3       | CACNA1H  | 3.288568 | 1.093152 | 61.55417 | 4.31E-15 | 4.30E-13 |
| 3       | KCNMA1   | 4.570233 | 0.738706 | 39.82824 | 2.77E-10 | 1.54E-08 |
| 4       | UGT1A1   | 10.41924 | 1.286226 | 201.2782 | 1.10E-45 | 4.01E-43 |
| 4       | UGDH     | 9.411177 | 0.617806 | 47.35648 | 5.92E-12 | 4.16E-10 |
| 5       | GSTA2    | 5.00096  | 0.900545 | 57.35624 | 3.64E-14 | 0.887722 |
| 5       | GSTA1    | 6.315528 | 0.940992 | 91.09722 | 1.37E-21 | 0.261818 |
