# Supplementary material for: Identification of rifampin-regulated functional modules and related microRNAs in human hepatocytes based on the protein interaction network
Source: PubMed Central journal article supplement (PMC5001204; doi:10.1186/s12864-016-2909-6), 2016-08-22
Supplement: 12864_2016_2909_MOESM3_ESM.pdf [file 12864_2016_2909_MOESM3_ESM.pdf]

| Annotation Cluster 1 | Enrichment Score:5.12 | term                                 | Count | P_Value  | Benjamini |
|----------------------|-----------------------|--------------------------------------|-------|----------|-----------|
| Annotation Cluster 2 | GOTERM_CC_FAT         | membrane fraction                    | 20    | 1.80E-08 | 4.00E-06  |
|                      | GOTERM_CC_FAT         | insoluble fraction                   | 20    | 3.30E-08 | 3.60E-06  |
|                      | GOTERM_CC_FAT         | cell fraction                        | 22    | 7.50E-08 | 5.50E-06  |
|                      | GOTERM_CC_FAT         | microsome                            | 11    | 3.90E-07 | 2.10E-05  |
|                      | GOTERM_CC_FAT         | vesicular fraction                   | 11    | 5.10E-07 | 2.20E-05  |
|                      | SP_PIR_KEYWORDS       | transmembrane protein                | 14    | 3.50E-06 | 2.50E-04  |
|                      | SP_PIR_KEYWORDS       | membrane                             | 30    | 3.60E-01 | 8.40E-01  |
|                      | GOTERM_CC_FAT         | intrinsic membrane                   | 21    | 9.90E-01 | 1.00E+00  |
|                      |                       | Enrichment Score:4.76                |       |          |           |
| Annotation Cluster 3 | GOTERM_BP_FAT         | membrane organization                | 13    | 1.70E-06 | 3.50E-04  |
|                      | GOTERM_BP_FAT         | vesicle-mediated transport           | 15    | 4.50E-06 | 8.10E-04  |
|                      | GOTERM_CC_FAT         | cytoplasmic vesicle                  | 15    | 4.70E-06 | 1.70E-04  |
|                      | GOTERM_BP_FAT         | endocytosis                          | 10    | 4.70E-06 | 7.40E-04  |
|                      | GOTERM_BP_FAT         | membrane invagination                | 10    | 4.70E-06 | 7.40E-04  |
|                      | GOTERM_CC_FAT         | vesicle                              | 15    | 7.60E-06 | 2.40E-04  |
|                      | GOTERM_BP_FAT         | phagocytosis                         | 5     | 1.60E-04 | 1.40E-02  |
|                      | SP_PIR_KEYWORDS       | Endocytosis                          | 4     | 8.30E-03 | 7.30E-02  |
|                      |                       | Enrichment Score:4.14                |       |          |           |
| Annotation Cluster 4 | GOTERM_CC_FAT         | cytoplasmic vesicle                  | 15    | 4.70E-06 | 1.70E-04  |
|                      | GOTERM_CC_FAT         | vesicle                              | 15    | 7.60E-06 | 2.40E-04  |
|                      | GOTERM_CC_FAT         | cytoplasmic membrane-bounded vesicle | 12    | 1.20E-04 | 3.30E-03  |
|                      | GOTERM_CC_FAT         | membrane-bounded vesicle             | 12    | 1.60E-04 | 3.90E-03  |
|                      | GOTERM_CC_FAT         | cytoplasmic vesicle part             | 6     | 2.90E-03 | 3.20E-02  |
|                      | Enrichment Score:3.95 |                                      |       |          |           |
|                      | GOTERM_BP_FAT         | regulation of apoptosis              | 19    | 5.10E-07 | 7.30E-04  |
|                      | GOTERM_BP_FAT         | regulation of programmed cell death  | 19    | 5.90E-07 | 4.20E-04  |
|                      | GOTERM_BP_FAT         | regulation of cell death             | 19    | 6.20E-07 | 3.00E-04  |

|                         |                        |                                                       |          |          |          |  |
|-------------------------|------------------------|-------------------------------------------------------|----------|----------|----------|--|
| Annotation<br>Cluster 5 | GOTERM_BP_FAT          | negative regulation<br>apoptosis                      | 13       | 7.90E-07 | 2.80E-04 |  |
|                         | GOTERM_BP_FAT          | negative regulation<br>cell death                     | 13       | 9.10E-07 | 2.60E-04 |  |
|                         | GOTERM_BP_FAT          | negative regulation<br>cell death                     | 13       | 9.40E-07 | 2.20E-04 |  |
|                         | GOTERM_BP_FAT          | anti-apoptosis                                        | 9        | 2.40E-05 | 2.60E-03 |  |
|                         | GOTERM_BP_FAT          | positive regulation of<br>apoptosis                   | 10       | 8.00E-04 | 4.60E-02 |  |
|                         | GOTERM_BP_FAT          | positive regulation of<br>programmed cell<br>death    | 10       | 8.40E-04 | 4.70E-02 |  |
|                         | GOTERM_BP_FAT          | positive regulation of<br>programmed cell<br>death    | 10       | 8.60E-04 | 4.60E-02 |  |
|                         | GOTERM_BP_FAT          | protein kinase                                        | 9        | 1.30E-03 | 5.70E-02 |  |
|                         | GOTERM_BP_FAT          | induction of cascade<br>apoptosis                     | 7        | 1.00E-02 | 2.00E-01 |  |
|                         | GOTERM_BP_FAT          | induction of cascade<br>cell death                    | 7        | 1.00E-02 | 2.00E-01 |  |
|                         | GOTERM_BP_FAT          | regulation of cascade                                 | 4        | 5.80E-02 | 4.90E-01 |  |
|                         | GOTERM_BP_FAT          | regulation of cascade<br>localization                 | 3        | 4.20E-01 | 9.60E-01 |  |
|                         | Enrichment Score: 2.96 |                                                       |          |          |          |  |
|                         | GOTERM_CC_FAT          | microsome                                             | 11       | 3.90E-07 | 2.10E-05 |  |
|                         | GOTERM_CC_FAT          | vesicular fraction                                    | 11       | 5.10E-07 | 2.20E-05 |  |
|                         | SP_PIR_KEYWORDS        | electron transfer                                     | 6        | 2.40E-06 | 2.60E-04 |  |
|                         | SP_PIR_KEYWORDS        | microsome                                             | 7        | 6.50E-06 | 2.80E-04 |  |
|                         | SP_PIR_KEYWORDS        | metalloprotein                                        | 7        | 1.60E-05 | 5.80E-04 |  |
|                         | UP_SEQ_FEATURE         | metal ion-binding<br>site:Iron (heme axial<br>ligand) | 6        | 6.80E-05 | 3.90E-02 |  |
|                         | GOTERM_MF_FAT          | oxygen binding                                        | 5        | 9.60E-05 | 2.90E-02 |  |
|                         | GOTERM_BP_FAT          | drug metabolic<br>process                             | 4        | 9.80E-05 | 9.20E-03 |  |
|                         | SP_PIR_KEYWORDS        | chromoprotein                                         | 5        | 1.50E-04 | 3.60E-03 |  |
|                         | SP_PIR_KEYWORDS        | heme                                                  | 6        | 1.80E-04 | 3.90E-03 |  |
|                         | KEGG_PATHWAY           | Metabolism of<br>xenobiotics by<br>cytochrome P450    | 6        | 2.00E-04 | 1.70E-02 |  |
|                         | GOTERM_MF_FAT          | iron ion binding                                      | 9        | 3.20E-04 | 3.20E-02 |  |
|                         | GOTERM_MF_FAT          | heme binding                                          | 6        | 5.90E-04 | 4.40E-02 |  |
| PIR_SUPERFAMILY         | PIRSF000045:cytoch     | 4                                                     | 7.60E-04 | 5.10E-02 |          |  |

|  |                 |                                                                                        |    |          |          |
|--|-----------------|----------------------------------------------------------------------------------------|----|----------|----------|
|  |                 | rome P450 CYP2D6                                                                       |    |          |          |
|  | GOTERM_MF_FAT   | tetrapyrrole binding                                                                   | 6  | 7.80E-04 | 4.70E-02 |
|  | KEGG_PATHWAY    | Retinol metabolism                                                                     | 5  | 1.40E-03 | 6.00E-02 |
|  | SP_PIR_KEYWORDS | iron                                                                                   | 7  | 1.50E-03 | 2.60E-02 |
|  | INTERPRO        | Cytochrome<br>P450,E-class,group I                                                     | 4  | 1.70E-03 | 3.70E-01 |
|  | KEGG_PATHWAY    | Drug metabolism                                                                        | 5  | 2.40E-03 | 6.70E-02 |
|  | INTERPRO        | Cytochrome<br>P450,E-class,group I                                                     | 4  | 2.50E-03 | 2.80E-01 |
|  | SP_PIR_KEYWORDS | oxidoreductase                                                                         | 9  | 2.90E-03 | 4.20E-02 |
|  | INTERPRO        | Cytochrome P450                                                                        | 4  | 3.10E-03 | 2.50E-01 |
|  | INTERPRO        | Cytochrome<br>P450,conserved site                                                      | 4  | 3.30E-03 | 2.00E-01 |
|  | GOTERM_BP_FAT   | oxidation reduction                                                                    | 11 | 3.60E-03 | 1.00E-01 |
|  | SP_PIR_KEYWORDS | nadp                                                                                   | 5  | 4.70E-03 | 5.50E-02 |
|  | SP_PIR_KEYWORDS | Monooxygenase<br>Secondary<br>metabolites                                              | 4  | 4.70E-03 | 5.30E-02 |
|  | COG_ONTOLOGY    | biosynthesis,transport<br>,and catabolism                                              | 4  | 8.00E-03 | 7.70E-02 |
|  | GOTERM_MF_FAT   | electron carrier<br>activity                                                           | 6  | 8.00E-03 | 2.60E-01 |
|  | GOTERM_CC_FAT   | endoplasmic<br>reticulum                                                               | 12 | 1.10E-02 | 8.70E-02 |
|  | SP_PIR_KEYWORDS | endoplasmic<br>reticulum<br>oxidoreductase<br>activity,acting on<br>paired donors,with | 9  | 1.20E-02 | 9.80E-02 |
|  | GOTERM_MF_FAT   | incorporation<br>reduction of<br>molecular oxygen<br>redulced flavin                   | 3  | 1.20E-02 | 3.10E-01 |
|  | GOTERM_CC_FAT   | extrinsic to<br>membrane                                                               | 8  | 1.50E-02 | 1.10E-01 |
|  | KEGG_PATHWAY    | Linoleic acid<br>metabolism                                                            | 3  | 2.70E-02 | 4.50E-01 |
|  | KEGG_PATHWAY    | Arachidonic acid<br>metabolism                                                         | 3  | 9.40E-02 | 5.70E-01 |
|  | GOTERM_CC_FAT   | endoplasmic<br>reticulum membrane                                                      | 4  | 1.70E-01 | 5.50E-01 |
|  | GOTERM_CC_FAT   | nuclear<br>envelope-endoplasmic<br>reticulum network                                   | 4  | 1.90E-01 | 5.70E-01 |

|                         |                       |                                                               |   |          |          |
|-------------------------|-----------------------|---------------------------------------------------------------|---|----------|----------|
| Annotation<br>Cluster 6 | GOTERM_CC_FAT         | endoplasmic<br>reticulum part                                 | 4 | 2.70E-01 | 6.80E-01 |
|                         | Enrichment Score:2.76 |                                                               |   |          |          |
|                         | GOTERM_BP_FAT         | regulation of<br>response to external<br>stimulus             | 7 | 3.10E-04 | 2.20E-02 |
|                         | GOTERM_BP_FAT         | regulation of blood<br>coagulation                            | 4 | 1.10E-03 | 5.50E-02 |
|                         | GOTERM_BP_FAT         | regulation of<br>coagulation                                  | 4 | 1.70E-03 | 7.00E-02 |
| Annotation<br>Cluster 7 | GOTERM_BP_FAT         | negative regulation of<br>multicellular<br>organismal process | 5 | 1.50E-02 | 2.30E-01 |
|                         | Enrichment Score:2.72 |                                                               |   |          |          |
|                         | GOTERM_BP_FAT         | phagocytosis                                                  | 5 | 1.60E-04 | 1.40E-02 |
|                         | GOTERM_BP_FAT         | apoptotic cell<br>clearance                                   | 3 | 4.80E-04 | 3.10E-02 |
|                         | GOTERM_CC_FAT         | cell surface                                                  | 7 | 9.60E-03 | 8.20E-02 |
| Annotation<br>Cluster 8 | GOTERM_MF_FAT         | lipoprotein binding                                           | 3 | 1.60E-02 | 3.70E-01 |
|                         | Enrichment Score:2.42 |                                                               |   |          |          |
|                         | SP_PIR_KEYWORDS       | microsome                                                     | 7 | 6.50E-06 | 2.80E-04 |
|                         | GOTERM_BP_FAT         | response to inorganic<br>substance                            | 9 | 2.30E-05 | 2.70E-03 |
|                         | GOTERM_BP_FAT         | response to metal ion                                         | 7 | 9.80E-05 | 8.70E-03 |
|                         | GOTERM_BP_FAT         | response to nutrient<br>levels                                | 7 | 9.50E-04 | 4.70E-02 |
|                         | GOTERM_BP_FAT         | response to nutrient                                          | 6 | 1.30E-03 | 5.90E-02 |
|                         | GOTERM_BP_FAT         | response to<br>extracellular stimulus                         | 7 | 1.70E-03 | 7.20E-02 |
|                         | GOTERM_BP_FAT         | response to<br>calciumion                                     | 4 | 3.90E-03 | 1.10E-01 |
|                         | GOTERM_BP_FAT         | heterocycle catabolic<br>process                              | 4 | 9.90E-03 | 1.90E-01 |
|                         | GOTERM_BP_FAT         | porphyrin metabolic<br>process                                | 3 | 1.20E-02 | 2.10E-01 |
|                         | GOTERM_BP_FAT         | tetrapyrrole<br>metabolic process                             | 3 | 1.20E-02 | 2.10E-01 |
|                         | GOTERM_BP_FAT         | response to starvation                                        | 3 | 2.40E-02 | 3.10E-01 |
|                         | GOTERM_BP_FAT         | cellular response to<br>nutrient levels                       | 3 | 2.70E-02 | 4.50E-01 |
|                         | GOTERM_BP_FAT         | cellular response to                                          | 3 | 5.30E-02 | 3.20E-01 |

|                          |                        |                                                                |          |          |          |
|--------------------------|------------------------|----------------------------------------------------------------|----------|----------|----------|
| Annotation<br>Cluster 9  | GOTERM_BP_FAT          | extracellular stimulus<br>cofactor metabolic<br>process        | 3        | 3.10E-01 | 9.00E-01 |
|                          | GOTERM_BP_FAT          | steroid metabolic<br>process                                   | 3        | 3.30E-01 | 9.10E-01 |
|                          | Enrichment Score:2.3   |                                                                |          |          |          |
|                          | GOTERM_BP_FAT          | embryonic<br>development ending<br>in birth or egg<br>hatching | 8        | 3.10E-03 | 1.00E-01 |
|                          | GOTERM_BP_FAT          | in tuero embryonic<br>development                              | 6        | 3.50E-03 | 1.10E-01 |
| Annotation<br>Cluster 10 | GOTERM_BP_FAT          | chordate embryonic<br>development                              | 7        | 1.20E-02 | 2.10E-01 |
|                          | Enrichment Score:2.29  |                                                                |          |          |          |
|                          | GOTERM_BP_FAT          | apoptosis                                                      | 11       | 2.30E-03 | 9.00E-02 |
|                          | GOTERM_BP_FAT          | programmed cell<br>death                                       | 11       | 2.60E-03 | 9.50E-02 |
|                          | GOTERM_BP_FAT          | cell death                                                     | 12       | 2.70E-03 | 9.50E-02 |
| Annotation<br>Cluster 11 | GOTERM_BP_FAT          | death                                                          | 12       | 2.80E-03 | 9.70E-02 |
|                          | SP_PIR_KEYWORDS        | Apoptosis                                                      | 5        | 8.30E-02 | 4.00E-01 |
|                          | Enrichment Score:2.12  |                                                                |          |          |          |
|                          | GOTERM_CC_FAT          | endomembrane<br>system                                         | 13       | 6.70E-04 | 1.20E-02 |
|                          | GOTERM_CC_FAT          | organelle membrane                                             | 15       | 1.40E-03 | 2.00E-02 |
| Annotation<br>Cluster 12 | GOTERM_CC_FAT          | Golgi membrane                                                 | 6        | 2.90E-03 | 3.30E-02 |
|                          | GOTERM_CC_FAT          | Golgi apparatus                                                | 11       | 1.50E-02 | 1.00E-01 |
|                          | GOTERM_CC_FAT          | Golgi apparatus part                                           | 6        | 1.90E-02 | 1.20E-01 |
|                          | SP_PIR_KEYWORDS        | golgi apparatus                                                | 5        | 2.50E-01 | 7.60E-01 |
|                          | Enrichment Score: 2.04 |                                                                |          |          |          |
|                          | GOTERM_CC_FAT          | basolateral plasma<br>membrane                                 | 7        | 6.60E-04 | 1.30E-02 |
|                          | GOTERM_CC_FAT          | focal adhesion                                                 | 5        | 2.00E-03 | 2.70E-02 |
|                          | GOTERM_CC_FAT          | cell-substrate<br>adherens junction                            | 5        | 2.30E-03 | 2.90E-02 |
|                          | GOTERM_CC_FAT          | cell-substrate<br>junction                                     | 5        | 2.80E-03 | 3.40E-02 |
|                          | GOTERM_CC_FAT          | adherens junction                                              | 5        | 8.80E-03 | 7.80E-02 |
| GOTERM_CC_FAT            | anchoring junction     | 5                                                              | 1.30E-02 | 9.50E-02 |          |
| GOTERM_BP_FAT            | response to drug       | 5                                                              | 3.60E-02 | 3.90E-01 |          |

|                          |                        |                                                       |    |          |          |
|--------------------------|------------------------|-------------------------------------------------------|----|----------|----------|
| Annotation<br>Cluster 13 | GOTERM_CC_FAT          | cell junction                                         | 7  | 5.40E-02 | 2.60E-01 |
|                          | SP_PIR_KEYWORDS        | golgi apparatus                                       | 5  | 2.50E-01 | 7.60E-01 |
|                          | Enrichment Score: 1.92 |                                                       |    |          |          |
|                          | SP_PIR_KEYWORDS        | zinc finger                                           | 5  | 4.30E-03 | 5.80E-02 |
|                          | GOTERM_BP_FAT          | protein complex assembly                              | 9  | 8.50E-03 | 1.70E-01 |
|                          | GOTERM_BP_FAT          | protein complex biogenesis                            | 9  | 8.50E-03 | 1.70E-01 |
|                          | GOTERM_BP_FAT          | macromolecular complex subunit organization           | 10 | 2.10E-02 | 2.80E-01 |
| Annotation<br>Cluster 14 | GOTERM_BP_FAT          | macromolecular complex assembly                       | 9  | 3.70E-02 | 4.00E-01 |
|                          | Enrichment Score: 1.78 |                                                       |    |          |          |
|                          | GOTERM_CC_FAT          | cell projection                                       | 12 | 9.20E-04 | 1.40E-02 |
|                          | GOTERM_CC_FAT          | cell soma                                             | 5  | 1.20E-02 | 9.10E-02 |
|                          | GOTERM_CC_FAT          | neuron projection                                     | 6  | 3.30E-02 | 1.70E-01 |
| Annotation<br>Cluster 15 | GOTERM_CC_FAT          | dendrite                                              | 3  | 2.10E-01 | 6.00E-01 |
|                          | Enrichment Score: 1.78 |                                                       |    |          |          |
|                          | GOTERM_BP_FAT          | response to organic substance                         | 14 | 2.20E-04 | 1.80E-02 |
|                          | GOTERM_BP_FAT          | regulation blood vessel size                          | 5  | 2.40E-04 | 1.80E-02 |
|                          | GOTERM_BP_FAT          | regulation of tube size                               | 5  | 2.40E-04 | 1.80E-02 |
|                          | GOTERM_BP_FAT          | vascular process in circulation system process        | 5  | 3.40E-04 | 2.30E-02 |
|                          | GOTERM_CC_FAT          | membrane raft                                         | 6  | 9.00E-04 | 1.50E-02 |
|                          | GOTERM_BP_FAT          | blood circulation                                     | 6  | 4.40E-03 | 1.20E-01 |
|                          | GOTERM_BP_FAT          | circulatory system process                            | 6  | 4.40E-03 | 1.20E-01 |
|                          | GOTERM_BP_FAT          | negative regulation of endothelial cell proliferation | 3  | 1.20E-01 | 1.20E-01 |
|                          | GOTERM_BP_FAT          | negative regulation of cell proliferation             | 8  | 4.70E-03 | 4.70E-03 |
|                          | UP_SEQ_FEATURE         | lipid moiety-binding region:S-palmitoyl cysteine      | 5  | 8.00E-03 | 6.10E-01 |
|                          | GOTERM_BP_FAT          | vasodilation                                          | 3  | 9.80E-03 | 1.90E-01 |

|                       |                       |                                                      |    |          |          |
|-----------------------|-----------------------|------------------------------------------------------|----|----------|----------|
|                       | SP_PIR_KEYWORDS       | palmitate                                            | 5  | 1.40E-02 | 1.10E-01 |
|                       | GOTERM_BP_FAT         | regulation of endothelial cell proliferation         | 3  | 1.50E-02 | 3.10E-01 |
|                       | GOTERM_BP_FAT         | response to steroid hormone stimulus                 | 5  | 2.50E-02 | 2.30E-01 |
|                       | GOTERM_CC_FAT         | caveola                                              | 3  | 3.00E-02 | 1.70E-01 |
|                       | KEGG_PATHWAY          | Focal adhesion adhesion                              | 6  | 3.70E-02 | 4.10E-01 |
|                       | GOTERM_BP_FAT         | regulation of cellular component biogenesis          | 4  | 4.90E-02 | 4.40E-01 |
|                       | GOTERM_BP_FAT         | divalent inorganic cation homeostasis                | 5  | 4.90E-02 | 4.40E-01 |
|                       | GOTERM_BP_FAT         | response to hormone stimulus                         | 6  | 6.10E-02 | 5.00E-01 |
|                       | GOTERM_BP_FAT         | response to endogenous stimulus                      | 6  | 8.40E-02 | 5.80E-01 |
|                       | GOTERM_BP_FAT         | positive regulation of signal transduction           | 5  | 9.10E-02 | 5.90E-01 |
|                       | GOTERM_BP_FAT         | regulation of system process                         | 5  | 1.00E-01 | 6.20E-01 |
|                       | GOTERM_BP_FAT         | regulation of blood pressure                         | 3  | 1.10E-01 | 6.50E-01 |
|                       | GOTERM_BP_FAT         | positive regulation of cell communication regulation | 5  | 1.20E-01 | 6.70E-01 |
|                       | GOTERM_BP_FAT         | response to estrogen stimulus                        | 3  | 1.20E-01 | 6.70E-01 |
|                       | GOTERM_BP_FAT         | second-messenger-mediated signaling                  | 3  | 3.90E-01 | 9.50E-01 |
|                       | GOTERM_MF_FAT         | identical protein binding                            | 5  | 4.90E-01 | 9.90E-01 |
|                       | KEGG_PATHWAY          | Neuroactive ligand-receptor interaction              | 3  | 6.90E-01 | 9.90E-01 |
| Annotation Cluster 16 | Enrichment Score:1.76 |                                                      |    |          |          |
|                       | GOTERM_BP_FAT         | protein kinase cascade                               | 9  | 1.30E-03 | 5.70E-02 |
|                       | GOTERM_BP_FAT         | activation of NF-kappaB-inducing kinase activity     | 3  | 2.50E-03 | 9.80E-02 |
|                       | GOTERM_BP_FAT         | positive regulation of catalytic activity            | 10 | 2.90E-03 | 1.10E-01 |

|                 |                                                |    |          |          |
|-----------------|------------------------------------------------|----|----------|----------|
| GOTERM_BP_FAT   | regulation of protein kinase activity          | 8  | 3.70E-03 | 9.30E-02 |
| GOTERM_BP_FAT   | regulation of kinase activity                  | 8  | 4.50E-03 | 1.20E-01 |
| GOTERM_BP_FAT   | regulation of transferase activity             | 8  | 5.60E-03 | 1.30E-01 |
| GOTERM_BP_FAT   | I-kappaB kinase/NF-kappaB cascade              | 4  | 5.70E-03 | 1.30E-01 |
| GOTERM_BP_FAT   | positive regulation of molecular function      | 10 | 6.40E-03 | 1.50E-01 |
| GOTERM_BP_FAT   | regulation of phosphorus metabolic process     | 9  | 6.70E-03 | 1.50E-01 |
| GOTERM_BP_FAT   | regulation of phosphate metabolic process      | 9  | 6.70E-03 | 1.80E-01 |
| GOTERM_BP_FAT   | negative regulation of signal transduction     | 6  | 8.90E-03 | 9.30E-03 |
| GOTERM_BP_FAT   | positive regulation of protein kinase activity | 6  | 1.90E-01 | 1.80E-01 |
| GOTERM_BP_FAT   | positive regulation of kinase activity         | 6  | 1.10E-02 | 1.40E-01 |
| GOTERM_BP_FAT   | intracellular signaling cascade                | 15 | 1.20E-02 | 2.10E-01 |
| GOTERM_BP_FAT   | positive regulation of transferase activity    | 6  | 1.20E-02 | 2.20E-01 |
| GOTERM_BP_FAT   | negative regulation of cell communication      | 6  | 1.40E-02 | 2.10E-01 |
| GOTERM_BP_FAT   | regulation of phosphorylation                  | 8  | 1.80E-02 | 2.60E-01 |
| GOTERM_BP_FAT   | activation of protein kinase activity          | 4  | 2.80E-02 | 4.70E-02 |
| GOTERM_BP_FAT   | positive regulation of response to stimulus    | 5  | 3.30E-01 | 4.40E-01 |
| SP_PIR_KEYWORDS | calcium binding                                | 3  | 7.30E-02 | 3.80E-01 |
| GOTERM_BP_FAT   | positive regulation of immune system process   | 4  | 7.90E-01 | 7.30E-01 |
| GOTERM_BP_FAT   | regulation of MAP kinase activity              | 3  | 2.00E-01 | 6.20E-01 |
| GOTERM_CC_FAT   | external side of plasma membrane               | 3  | 2.20E-01 | 1.60E-01 |
| SP_PIR_KEYWORDS | calcium                                        | 5  | 4.60E-01 | 9.10E-01 |



|                          |                       |                                                                 |   |          |          |
|--------------------------|-----------------------|-----------------------------------------------------------------|---|----------|----------|
| Annotation<br>Cluster 17 | GOTERM_MF_FAT         | calcium ion binding                                             | 4 | 9.00E-01 | 1.00E+00 |
|                          | Enrichment Score:1.63 |                                                                 |   |          |          |
|                          | GOTERM_BP_FAT         | response to hypoxia                                             | 8 | 1.20E-05 | 1.70E-03 |
|                          | GOTERM_BP_FAT         | response to oxygen levels                                       | 8 | 1.60E-05 | 2.10E-03 |
|                          | GOTERM_BP_FAT         | positive regulation of cell adhesion                            | 4 | 5.00E-03 | 1.20E-01 |
|                          | GOTERM_BP_FAT         | regulation of cell-matrix adhesion                              | 3 | 1.00E-02 | 1.90E-01 |
|                          | GOTERM_BP_FAT         | positive regulation of cell-sbustrate adhesion                  | 3 | 1.10E-02 | 1.50E-02 |
|                          | GOTERM_BP_FAT         | negative regulation of muticellular organismal process          | 5 | 2.00E-01 | 2.30E-01 |
|                          | GOTERM_BP_FAT         | regulation of transforming growth factor beta receptor sinaling | 3 | 2.10E-02 | 2.80E-01 |
|                          | GOTERM_BP_FAT         | positive regulaton of developmental process                     | 6 | 2.20E-02 | 3.10E-01 |
|                          | GOTERM_BP_FAT         | response to steroid hormone stimulus                            | 5 | 2.50E-02 | 2.90E-01 |
|                          | GOTERM_BP_FAT         | regulation of cell-substrate adhesion                           | 3 | 2.90E-02 | 3.40E-01 |
|                          | GOTERM_BP_FAT         | negative regulation of cell migration                           | 3 | 4.30E-02 | 4.30E-01 |
|                          | GOTERM_BP_FAT         | regulation of cell adhesion                                     | 4 | 4.50E-02 | 4.20E-01 |
|                          | GOTERM_BP_FAT         | negative regulation of locomotion                               | 3 | 4.80E-02 | 4.40E-01 |
|                          | GOTERM_BP_FAT         | negative regulation of cell motion                              | 3 | 5.10E-02 | 4.50E-01 |
|                          | GOTERM_BP_FAT         | regulation of cell migration                                    | 4 | 7.40E-02 | 5.50E-01 |
|                          | GOTERM_BP_FAT         | positive regulation of signal transduciton                      | 5 | 9.10E-02 | 5.90E-01 |
|                          | GOTERM_BP_FAT         | regulation of                                                   | 4 | 9.90E-02 | 6.20E-01 |

|                          |                       |                                                            |   |          |              |  |
|--------------------------|-----------------------|------------------------------------------------------------|---|----------|--------------|--|
| Annotation<br>Cluster 18 |                       | locomotion                                                 |   |          | 1            |  |
|                          | GOTERM_BP_FAT         | regulation of cell<br>motion                               | 4 | 1.00E-01 | 6.20E-0<br>1 |  |
|                          | GOTERM_BP_FAT         | positive regulation<br>of cell<br>communication            | 5 | 1.20E-01 | 6.70E-0<br>1 |  |
|                          | GOTERM_BP_FAT         | blood vessel<br>morphogenesis                              | 4 | 1.20E-01 | 6.70E-0<br>1 |  |
|                          | GOTERM_BP_FAT         | blood vessel<br>development                                | 4 | 1.70E-01 | 7.50E-0<br>1 |  |
|                          | GOTERM_BP_FAT         | vasculature<br>development                                 | 4 | 1.80E-01 | 7.60E-0<br>1 |  |
|                          | GOTERM_BP_FAT         | negative regulation<br>of cell<br>differentiation          | 3 | 3.50E-01 | 9.30E-0<br>1 |  |
|                          | Enrichment Score:1.48 |                                                            |   |          |              |  |
| Annotation<br>Cluster 19 | GOTERM_BP_FAT         | positive regulation<br>of cytokine<br>production           | 5 | 1.80E-03 | 7.30E-02     |  |
|                          | GOTERM_BP_FAT         | regulation of of<br>cytokine production                    | 6 | 3.90E-03 | 1.10E-01     |  |
|                          | GOTERM_BP_FAT         | positive regulation<br>response to<br>stimulus             | 5 | 9.20E-01 | 4.70E-02     |  |
|                          | GOTERM_BP_FAT         | posttranscriptional<br>regulation of gene<br>expression    | 3 | 3.40E-01 | 4.40E-01     |  |
|                          | GOTERM_BP_FAT         | immune response                                            | 6 | 3.70E-01 | 9.40E-01     |  |
|                          |                       | Enrichment Score:1.42                                      |   |          |              |  |
|                          | GOTERM_BP_FAT         | positive regulation<br>of developmental<br>process         | 6 | 2.20E-02 | 4.70E-02     |  |
| Annotation<br>Cluster 20 | GOTERM_BP_FAT         | positive regulation<br>of response to<br>stimulus          | 5 | 2.90E-01 | 4.40E-01     |  |
|                          | GOTERM_BP_FAT         | positive regulation<br>of response to<br>external stimulus | 3 | 5.30E-02 | 4.50E-01     |  |
|                          |                       | Enrichment Score:1.38                                      |   |          |              |  |
|                          | GOTERM_CC_FAT         | apical plasma<br>membrane                                  | 4 | 3.30E-02 | 1.70E-01     |  |

|  |               |                      |   |          |          |
|--|---------------|----------------------|---|----------|----------|
|  | GOTERM_BP_FAT | vesicle organization | 3 | 3.60E-02 | 3.90E-01 |
|  | KEGG_PATHWAY  | Focal adhesion       | 6 | 3.70E-02 | 4.10E-01 |
|  | GOTERM_CC_FAT | apical part of cell  | 4 | 6.80E-02 | 3.10E-01 |
